# Supplementary material for: Selective biomolecular separation system inspired by the nuclear pore complex and nuclear transport
Source: Royal Society of Chemistry journal article supplement (doi:10.1039/c7me00006e), 2017-01-01
Supplement: c7me00006e1.pdf [file c7me00006e1.pdf]

Supporting information for

# Selective Biomolecular Separation System Inspired by the Nuclear Pore Complex and Nuclear Transport

Minkyu Kim,<sup>a</sup> Wesley G. Chen,<sup>b</sup> Bruno S. Souza,<sup>ac</sup> and Bradley D. Olsen<sup>\*a</sup>

<sup>a</sup>Department of Chemical Engineering, Massachusetts Institute of Technology, Cambridge, MA  
02139, USA

<sup>b</sup>Department of Biological Engineering, Massachusetts Institute of Technology, Cambridge, MA  
02139, USA

<sup>c</sup>Department of Chemistry, Federal University of Santa Catarina, Florianópolis, Santa Catarina,  
Brazil

\*Correspondence should be addressed to Bradley D. Olsen ([bdolsen@mit.edu](mailto:bdolsen@mit.edu))

NTF2

MGDKPIWEQIGSSFIQHYYQLFDNDRTQLGAIYIDASCLTWEGQQFQGKAAIVEKLSSLP  
FQKIQHSITAQDHQPTPDSCIISMVVGQLKADEDPIMGFHQMFLLKNINDAWVCTNDMF  
RLALHNFGGSRSHHHHHH

NTF2-GFP

MGDKPIWEQIGSSFIQHYYQLFDNDRTQLGAIYIDASCLTWEGQQFQGKAAIVEKLSSLP  
FQKIQHSITAQDHQPTPDSCIISMVVGQLKADEDPIMGFHQMFLLKNINDAWVCTNDMF  
RLALHNFGTSGSACELMVSKGEELFTGVVPILVELDGDVNGHKFSVRGEGEGDATNGK  
LTLKFICTTGKLPVPWPTLVTTLTYGVCFSRYPDHMKQHDFFKSAMPEGYVQERTISF  
KDDGTYKTRAEVKFEGDTLVNRIELKGIDFKEDGNILGHKLEYNFNSHNVYITADKQKN  
GIKANFKIRHNVEDGSVQLADHYQQNTPIGDGPVLLPDNHYLSTQSALS KDPNEKRDH  
MVLLEFVTAAGITHGMDELYKGSRSHHHHHH

NTF2-GFP11

MGDKPIWEQIGSSFIQHYYQLFDNDRTQLGAIYIDASCLTWEGQQFQGKAAIVEKLSSLP  
FQKIQHSITAQDHQPTPDSCIISMVVGQLKADEDPIMGFHQMFLLKNINDAWVCTNDMF  
RLALHNFGTSSGSGHHHHHHASGGSGGGSRDHMVLHEYVNAAGIT

GFP1-10

MGSSHHHHHHSSGLVPRGSHMSKGEELFTGVVPILVELDGDVNGHKFSVRGEGEGDAT  
IGKLTTLKFICTTGKLPVPWPTLVTTLTYGVCFSRYPDHMKRHDFFKSAMPEGYVQERTI  
SFKDDGKYKTRAVVKFEGDTLVNRIELKGTDFKEDGNILGHKLEYNFNSHNVYITADKQ  
KNGIKANFTVRHNVEDGSVQLADHYQQNTPIGDGPVLLPDNHYLSTQTVLSKDPNEK

NTF2-R418

MRGTMGDKPIWEQIGSSFIQHYYQLFDNDRTQLGAIYIDASCLTWEGQQFQGKAAIVEK  
LSSLPFQKIQHSITAQDHQPTPDSCIISMVVGQLKADEDPIMGFHQMFLLKNINDAWVCT  
NDMFRLALHNFGTSSGSGHHHHHHGSGGSGGGSSYSCHYWLSSAVPYM

NTF2-R445

MRGTMGDKPIWEQIGSSFIQHYYQLFDNDRTQLGAIYIDASCLTWEGQQFQGKAAIVEK  
LSSLPFQKIQHSITAQDHQPTPDSCIISMVVGQLKADEDPIMGFHQMFLLKNINDAWVCT  
NDMFRLALHNFGTSSGSGHHHHHHGSGGSGGGSSCLLRDTRDCHYWTQ

**Figure S1.** Protein sequences used in this study.

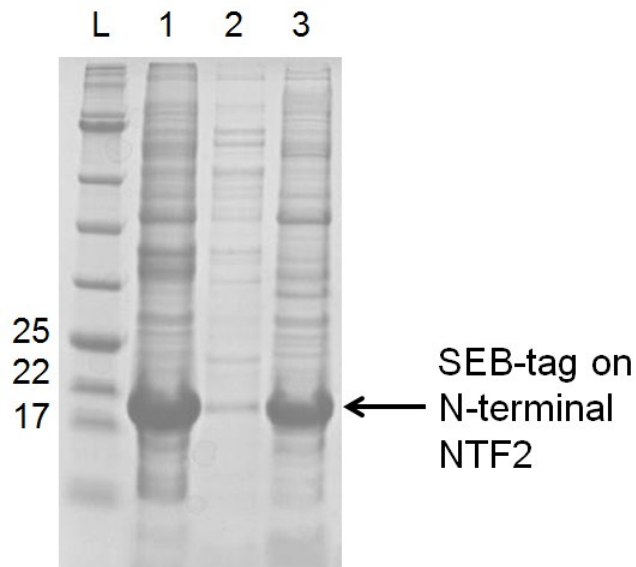

**Figure S2.** SDS-PAGE of engineered NTF2 fused with anti-SEB tag on its N-terminus. L: Ladder, 1: total cell lysate, 2: soluble protein fraction of #1 and 3: insoluble protein fraction of #1

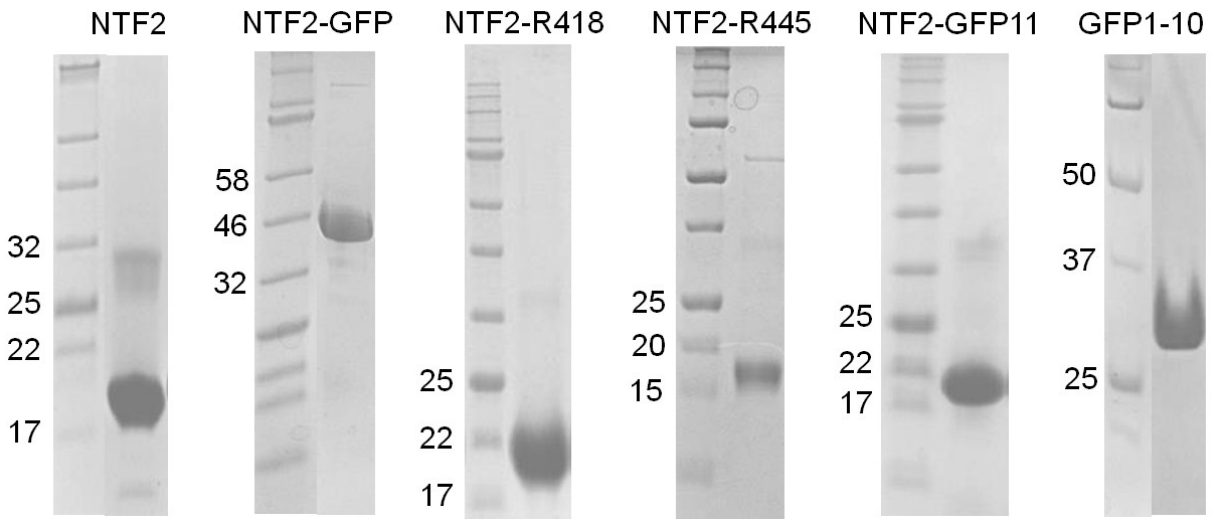

**Figure S3.** SDS-PAGE of purified protein samples used in this study.

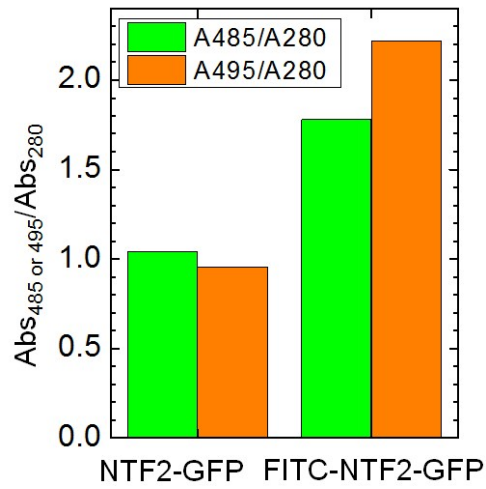

**Figure S4.** Optical absorbance enhancement by FITC labeling on NTF2-GFP. The enhancement by FITC is determined by the absorbance of the sample at 280 nm and 485 nm for NTF2-GFP, and 280 nm and 495 nm for FITC-NTF2-GFP.

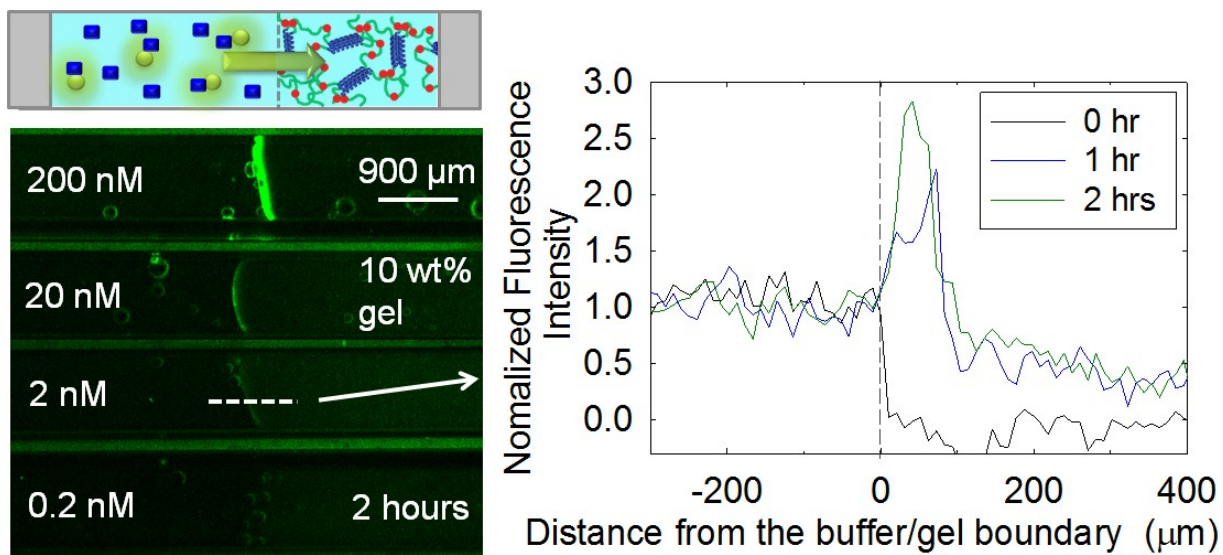

**Figure S5.** Transport into 10 wt.% NLP gels. Various concentrations of FITC-NTF2-GFP (blue rectangle and green circle) with maintaining 20  $\mu$ M NTF2 (blue rectangle only) are tested with 10 wt.% NLP gel. Similar to 20 wt.% gel (Fig. 1), 10 wt.% gel also can absorb target GFP molecules from the buffer containing 2 nM target molecule ( $t = 0$ ). NLP gel in the capillary with FITC-NTF2-GFP of 0.2 nM did not show any green fluorescence accumulation on the gel over time. This indicates that NLP gel can absorb target molecules carried by NTF2 with concentrations of at least the single nanomolar range, although the ultimate sensitivity may be limited by the fluorescence detection limit of the microscope and not by the gel performance.

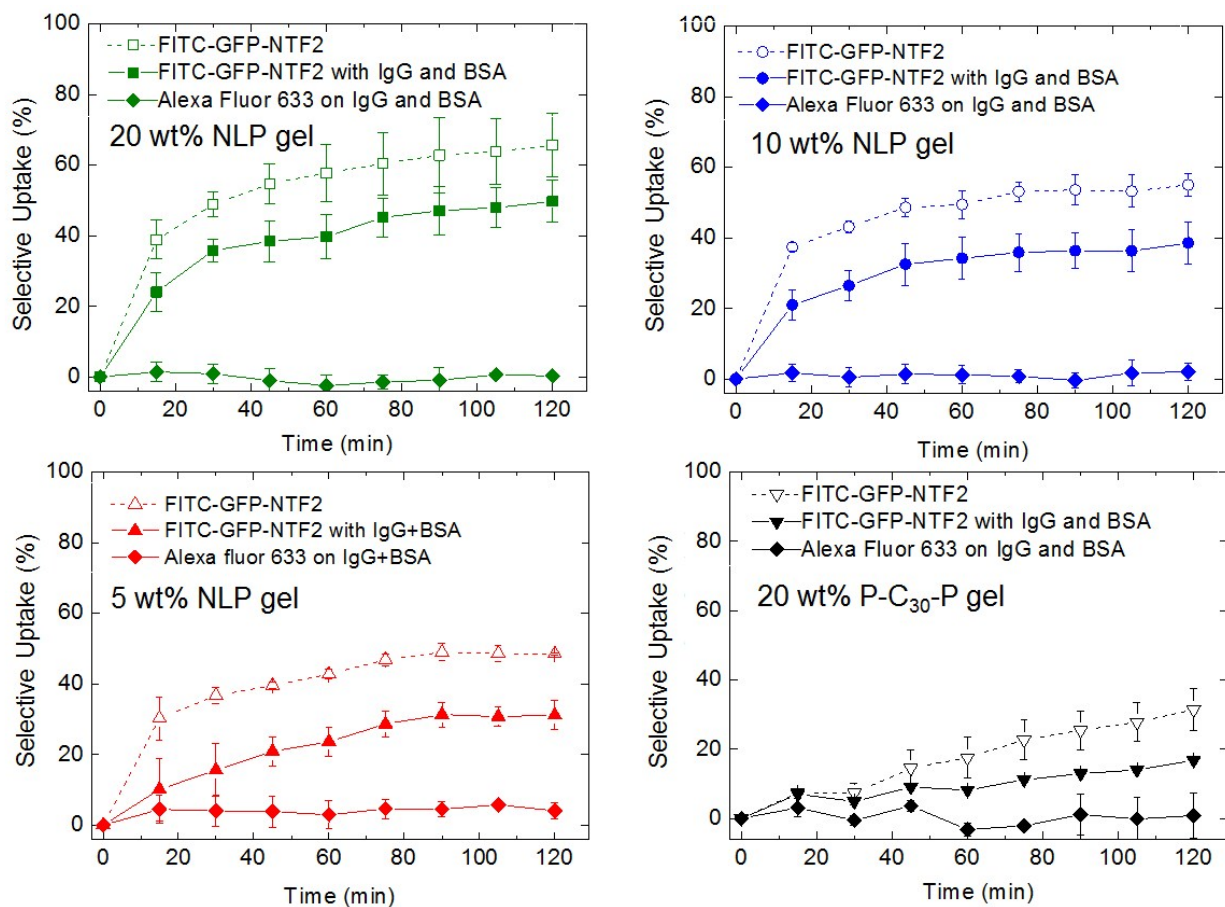

**Figure S6.** Average selective uptake of FITC-NTF2-GFP by 20 wt.% NLP gel ( $n = 3$ ), 10 wt.% NLP gel ( $n = 5$ ), 5 wt.% NLP gel ( $n = 3$ ) and control 20 wt.% P-C<sub>30</sub>-P gel ( $n = 2$ ) in the absence (empty objects) or in the presence (filled objects) of IgG and BSA. The uptake amounts of IgG and BSA by gels are also tracked in time series (filled diamond).

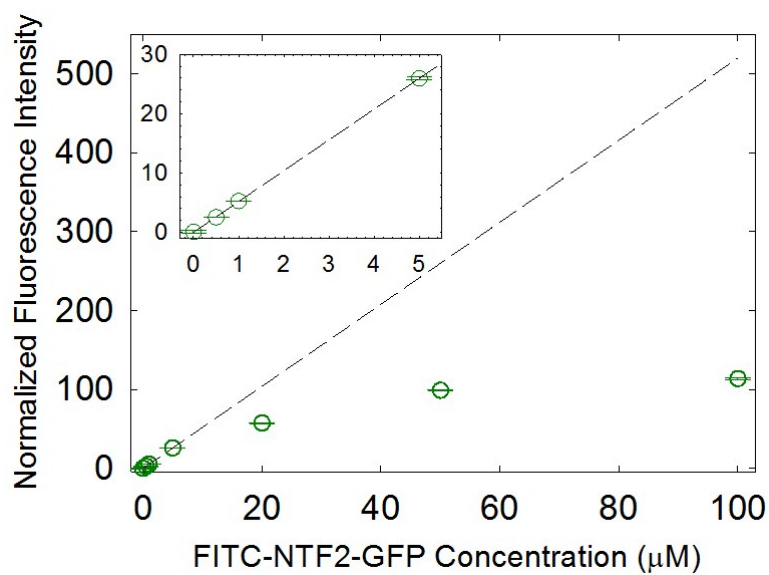

**Figure S7.** Linear fluorescence regions of FITC-NTF2-GFP under the microscope used in this study. Fluorescence intensities of each concentration are normalized with the intensity of 1  $\mu\text{M}$  FITC-NTF2-GFP. Changes in fluorescence intensity of FITC-NTF2-GFP are linear when molecular concentrations are below 5  $\mu\text{M}$ . All of capillary assays with FITC-NTF2-GFP were performed in the linear region (Fig. 2-3, Fig. S5 and S6).

**Table S1.** DNA plasmids that were used in this study

| Protein name | Expressed protein            | Vector  | Reference                                                              |
|--------------|------------------------------|---------|------------------------------------------------------------------------|
| P-2NLP-P     | P-2NLP-P- His <sub>6</sub>   | pET-22b | Kim et al. <sup>1</sup>                                                |
| NTF2         | NTF2-His <sub>6</sub>        | pQE-30  | This study; Ribbeck et al. <sup>2</sup>                                |
| NTF2-GFP     | NTF2-GFP-His <sub>6</sub>    | pQE-30  | This study; Pédelacq et al. <sup>3</sup>                               |
| NTF2-GFP11   | NTF2-His <sub>6</sub> -GFP11 | pQE-30  | This study; Cabantous et al. <sup>4,5</sup> , Kent et al. <sup>6</sup> |
| NTF2-R418    | NTF2-His <sub>6</sub> -R418  | pQE-30  | This study; Kogot et al. <sup>7</sup>                                  |
| NTF2-R445    | NTF2-His <sub>6</sub> -R445  | pQE-30  | This study; Kogot et al. <sup>7</sup>                                  |
| GFP1-10      | His <sub>6</sub> -GFP1-10    | pET15b  | Cabantous et al. <sup>4,5</sup> , Kent et al. <sup>6</sup>             |

## References

1. M. Kim, W. G. Chen, J. W. Kang, M. J. Glassman, K. Ribbeck and B. D. Olsen, *Adv. Mater.*, 2015, **27**, 4207-4212.
2. K. Ribbeck and D. Gorlich, *EMBO J.*, 2001, **20**, 1320-1330.
3. J. D. Pedelacq, S. Cabantous, T. Tran, T. C. Terwilliger and G. S. Waldo, *Nat Biotechnol.*, 2006, **24**, 79-88.
4. S. Cabantous, T. C. Terwilliger and G. S. Waldo, *Nat. Biotechnol.*, 2005, **23**, 102-107.
5. S. Cabantous and G. S. Waldo, *Nat Methods*, 2006, **3**, 845-854.
6. K. P. Kent, W. Childs and S. G. Boxer, *J Am Chem Soc*, 2008, **130**, 9664-9665.
7. J. M. Kogot, J. M. Pennington, D. A. Sarkes, D. A. Kingery, P. M. Pellegrino and D. N. Stratis-Cullum, *J. Mol. Recognit.*, 2014, **27**, 739-745.
